# Supplementary material for: Photocatalytic oxidation of benzene to phenol using dioxygen as an oxygen source and water as an electron source in the presence of a cobalt catalyst
Source: Royal Society of Chemistry journal article supplement (doi:10.1039/c7sc02495a), 2017-01-01
Supplement: c7sc02495a1.pdf [file c7sc02495a1.pdf]

## Electronic Supplementary Information

### Photocatalytic oxidation of benzene to phenol using dioxygen as an oxygen source and water as an electron source in the presence of a cobalt catalyst

Ji Won Han,<sup>‡a</sup> Jieun Jung,<sup>‡ab</sup> Yong-Min Lee,<sup>a</sup> Wonwoo Nam<sup>\*a</sup> and Shunichi  
Fukuzumi<sup>\*ac</sup>

<sup>a</sup> *Department of Chemistry and Nano Science, Ewha Womans University, Seoul 03760,  
Korea*

<sup>b</sup> *Department of Chemistry, Graduate School of Science, Nagoya University, Chikusa,  
Nagoya 464-8602, Japan*

<sup>c</sup> *Faculty of Science and Engineering, Meijo University, SENTAN, Japan Science and  
Technology Agency (JST), Nagoya, Aichi 468-8502, Japan*

<sup>‡</sup> *These authors contributed equally to this work.*

<sup>\*</sup> *To whom correspondence should be addressed.*

E-mail: [wwnam@ewha.ac.kr](mailto:wwnam@ewha.ac.kr), [fukuzumi@chem.eng.osaka-u.ac.jp](mailto:fukuzumi@chem.eng.osaka-u.ac.jp)

**Table S1** Stern-Volmer quenching constants ( $K_{SV}$ ), excited state lifetimes ( $\tau_0$ ) in the absence of quencher, and rate constants ( $k_{et}$ ) of photoinduced electron transfer from  $[\text{Ru}^{\text{II}}(\text{Me}_2\text{phen})_3]^{2+*}$  to  $\text{O}_2$  in the absence and presence of  $\text{Sc}(\text{NO}_3)_3$  (100 mM) in a solvent mixture of MeCN and  $\text{H}_2\text{O}$  ( $v/v = 23:2$ ) at 273 K.

|                     | without $\text{Sc}(\text{NO}_3)_3$                 | with $\text{Sc}(\text{NO}_3)_3$                    |
|---------------------|----------------------------------------------------|----------------------------------------------------|
| $K_{SV}^{\text{a}}$ | $8.2(6) \times 10^2 \text{ M}^{-1}$                | $1.1(1) \times 10^3 \text{ M}^{-1}$                |
| $\tau_0$            | $7.6(6) \times 10^{-7} \text{ s}$                  | $7.1(6) \times 10^{-7} \text{ s}$                  |
| $k_{et}^{\text{b}}$ | $1.1(1) \times 10^9 \text{ M}^{-1} \text{ s}^{-1}$ | $1.5(1) \times 10^9 \text{ M}^{-1} \text{ s}^{-1}$ |

<sup>a</sup> The Stern-Volmer quenching constant ( $K_{SV}$ ) was obtained from the slope of the Stern-Volmer plot,  $I_0/I - 1$  vs.  $[\text{O}_2]$  (see Figure S5c). Stern-Volmer equation is  $I_0/I = 1 + K_{SV}[\text{Q}]$ , where  $I_0$  and  $I$  are the emission intensities observed in the absence and presence of quencher, Q.

<sup>b</sup>  $K_{SV} = k_q \times \tau_0$ , where  $k_q$  is bimolecular quenching rate constant and  $\tau_0$  is the excited state lifetime in the absence of quencher. Therefore, the observed rate constants ( $k_{et}$ ) were obtained from the  $K_{SV}$  and the emission lifetime ( $\tau_0$ ) (*i.e.*,  $k_{et} = K_{SV} / \tau_0$ ).

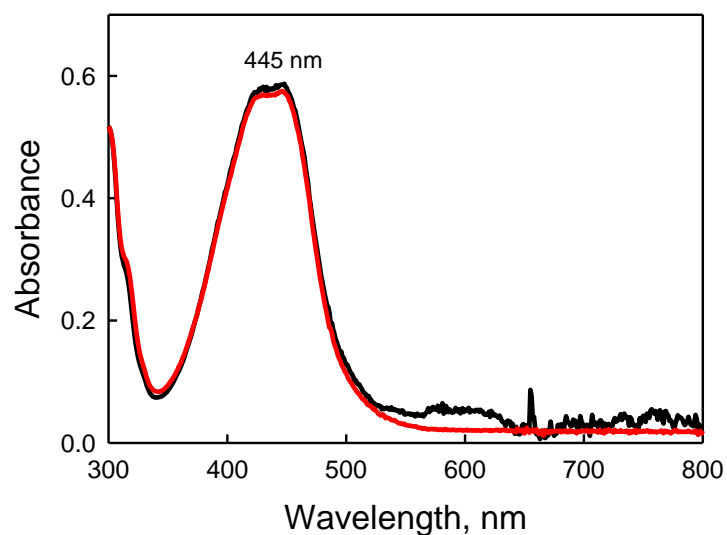

**Fig. S1** UV-visible absorption spectra of the 50 times diluted reaction solution [before reaction (black line) and after reaction for 15 h (red line)] obtained in the photocatalytic oxidation of benzene under photoirradiation (white light) of an O<sub>2</sub>-saturated solvent mixture of MeCN and H<sub>2</sub>O (v/v = 23:2) containing **1** (0.10 mM), [Ru<sup>II</sup>(Me<sub>2</sub>phen)<sub>3</sub>]<sup>2+</sup> (1.0 mM), Sc(NO<sub>3</sub>)<sub>3</sub> (100 mM), and benzene (1.0 mM) at 298 K.

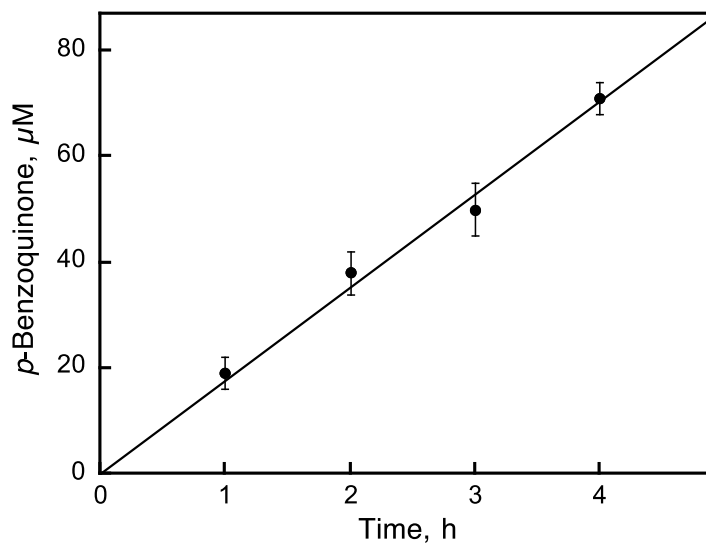

**Fig. S2** Time course of concentration of *p*-benzoquinone produced in the photocatalytic oxidation of phenol (PhOH) by O<sub>2</sub> under photoirradiation (white light) of an O<sub>2</sub>-saturated solvent mixture of MeCN and H<sub>2</sub>O (*v/v* = 23:2) containing **1** (1.0  $\mu\text{M}$ ), [Ru<sup>II</sup>(Me<sub>2</sub>phen)<sub>3</sub>]<sup>2+</sup> (1.0 mM), Sc(NO<sub>3</sub>)<sub>3</sub> (100 mM), and PhOH (1.0 mM) at 298 K.

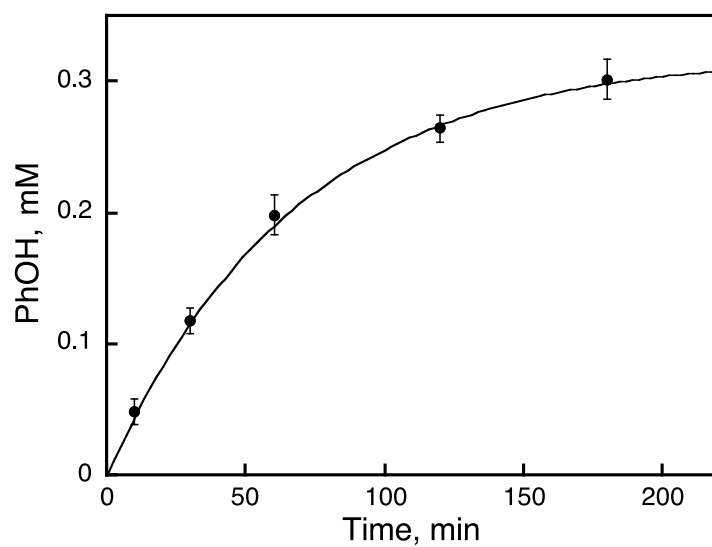

**Fig. S3** Time course of concentration of PhOH produced in the photocatalytic oxidation of benzene under photoirradiation ( $\lambda = 440$  nm with filter) of an O<sub>2</sub>-saturated solvent mixture of MeCN and H<sub>2</sub>O ( $v/v = 23:2$ ) containing **1** (1.0 mM), [Ru<sup>II</sup>(Me<sub>2</sub>phen)<sub>3</sub>]<sup>2+</sup> (1.0 mM), Sc(NO<sub>3</sub>)<sub>3</sub> (100 mM), and benzene (2.0 M) at 298 K.

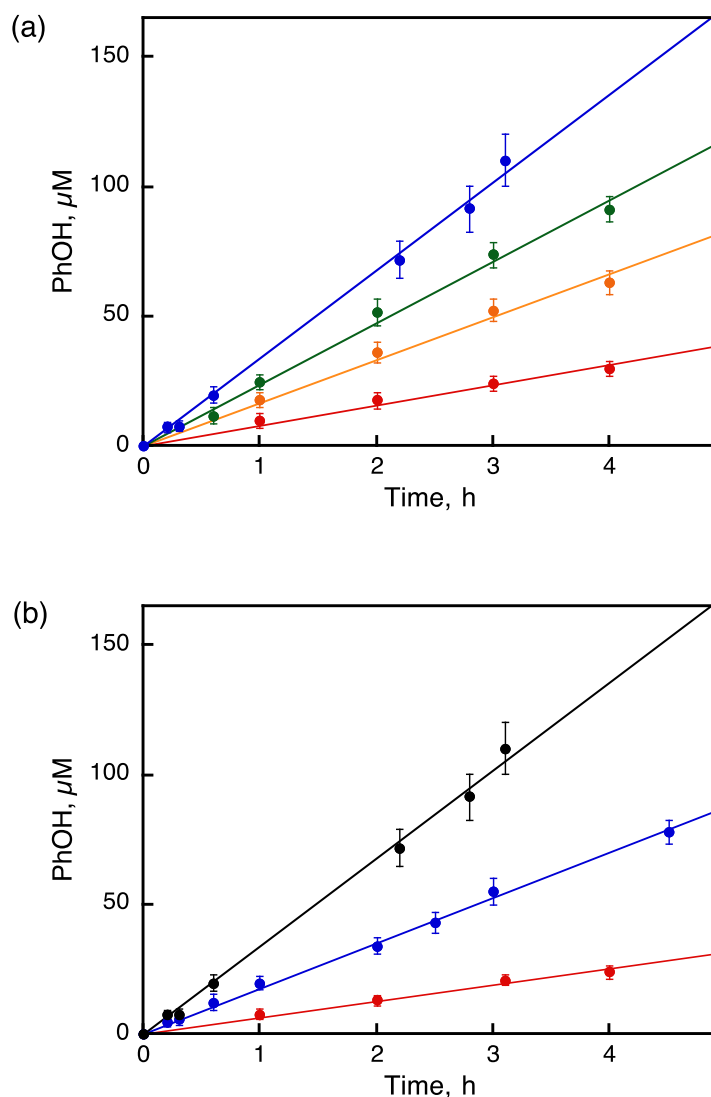

**Fig. S4** (a) Time courses of concentration of PhOH produced in the photocatalytic oxidation of benzene under photoirradiation (white light) of an  $\text{O}_2$ -saturated solvent mixture of MeCN and  $\text{H}_2\text{O}$  ( $v/v = 23:2$ ) containing **1** ( $1.0 \mu\text{M}$ ),  $[\text{Ru}^{\text{II}}(\text{Me}_2\text{phen})_3]^{2+}$  ( $1.0 \text{ mM}$ ), and benzene [ $0.25 \text{ M}$  (red),  $0.50 \text{ M}$  (orange),  $0.75 \text{ M}$  (green), and  $1.0 \text{ M}$  (blue)] in the presence of  $\text{Sc}(\text{NO}_3)_3$  ( $100 \text{ mM}$ ) at  $298 \text{ K}$ . (b) Time courses of concentration of PhOH produced in the photocatalytic oxidation of benzene under photoirradiation (white light) of an  $\text{O}_2$ -saturated solvent mixture of MeCN and  $\text{H}_2\text{O}$  ( $v/v = 23:2$ ) containing **1** ( $1.0 \mu\text{M}$ ),  $[\text{Ru}^{\text{II}}(\text{Me}_2\text{phen})_3]^{2+}$  [ $0.10 \text{ mM}$  (red),  $0.50 \text{ mM}$  (blue), and  $1.0 \text{ mM}$  (black)], and benzene ( $1.0 \text{ M}$ ) in the presence of  $\text{Sc}(\text{NO}_3)_3$  ( $100 \text{ mM}$ ) at  $298 \text{ K}$ .

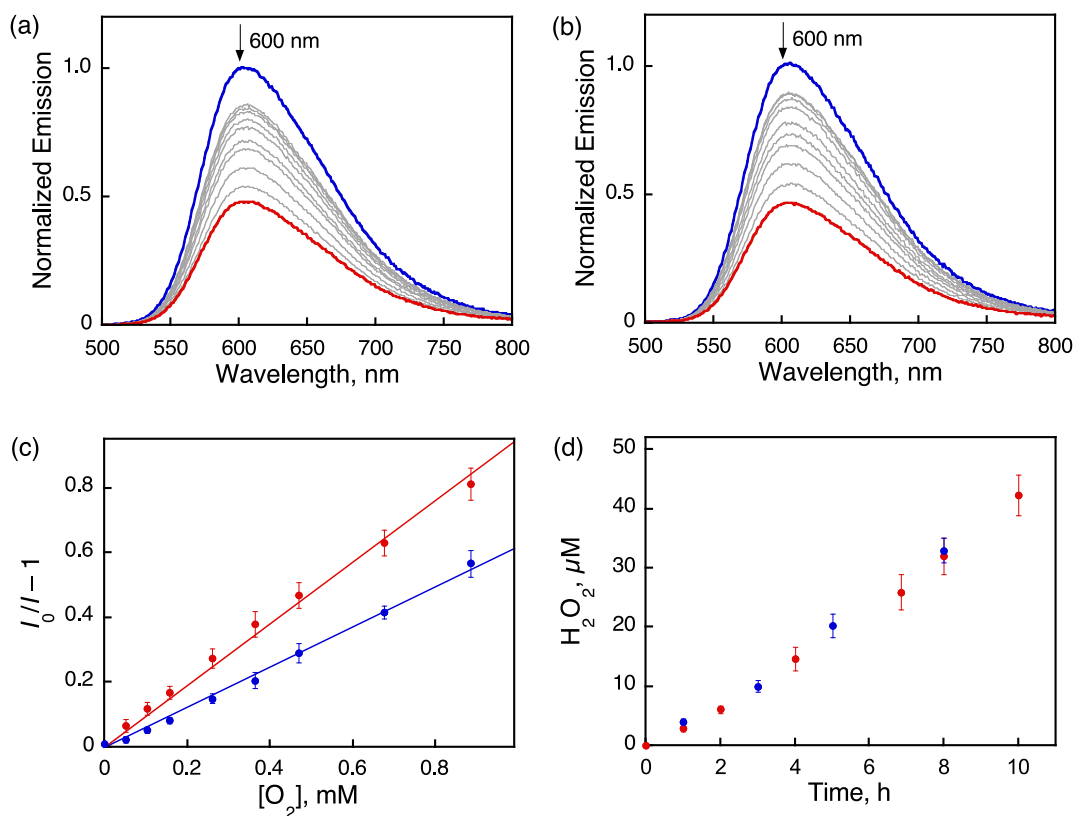

**Fig. S5** (a, b) Emission spectra of  $[\text{Ru}^{\text{II}}(\text{Me}_2\text{phen})_3]^{2+}$  ( $4.0 \mu\text{M}$ ) in the presence of  $\text{O}_2$  [0 mM (blue) – 1.2 mM (red)] observed under visible light excitation ( $\lambda = 450 \text{ nm}$ ) of an  $\text{O}_2$ -saturated solvent mixture of MeCN and  $\text{H}_2\text{O}$  ( $v/v = 23:2$ ) containing  $[\text{Ru}^{\text{II}}(\text{Me}_2\text{phen})_3]^{2+}$  ( $4.0 \mu\text{M}$ ) in the absence (a) and presence (b) of  $\text{Sc}(\text{NO}_3)_3$  (100 mM) at 298 K. (c) Stern-Volmer plots for the emission quenching of  $[\text{Ru}^{\text{II}}(\text{Me}_2\text{phen})_3]^{2+}$  by  $\text{O}_2$  determined from emission spectra in the absence (blue) and presence (red) of  $\text{Sc}(\text{NO}_3)_3$  (100 mM) at 298 K. (d) Time courses of concentration of  $\text{H}_2\text{O}_2$  produced from  $\text{H}_2\text{O}$  and  $\text{O}_2$  for the photocatalytic oxidation of  $[\text{Ru}^{\text{II}}(\text{Me}_2\text{phen})_3]^{2+}$  under photoirradiation (white light) of an air-saturated (blue) and  $\text{O}_2$ -saturated (red) solvent mixture of MeCN and  $\text{H}_2\text{O}$  ( $v/v = 23:2$ ) containing  $[\text{Ru}^{\text{II}}(\text{Me}_2\text{phen})_3]^{2+}$  ( $100 \mu\text{M}$ ) in the presence of  $\text{Sc}(\text{NO}_3)_3$  (100 mM) at 298 K.

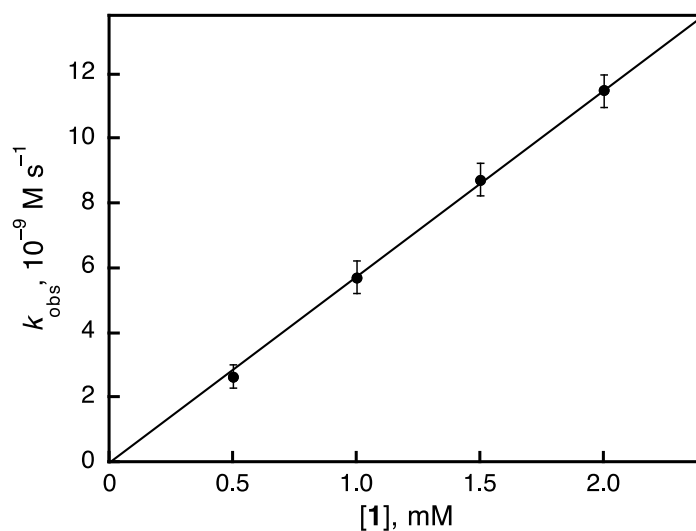

**Fig. S6** Plot of the zeroth-order rate constants ( $k_{\text{obs}}$ ) for the  $\text{H}_2\text{O}_2$  production vs. the concentration of **1** in the photocatalytic oxidation of  $\text{H}_2\text{O}$  by  $\text{O}_2$  upon photoirradiation (white light) of an  $\text{O}_2$ -saturated solvent mixture of MeCN and  $\text{H}_2\text{O}$  ( $v/v = 23:2$ ) containing **1** (0.50 – 2.0 mM) and  $[\text{Ru}^{\text{II}}(\text{Me}_2\text{phen})_3]^{2+}$  (0.10 mM) in the presence of  $\text{Sc}(\text{NO}_3)_3$  (100 mM) at 298 K.



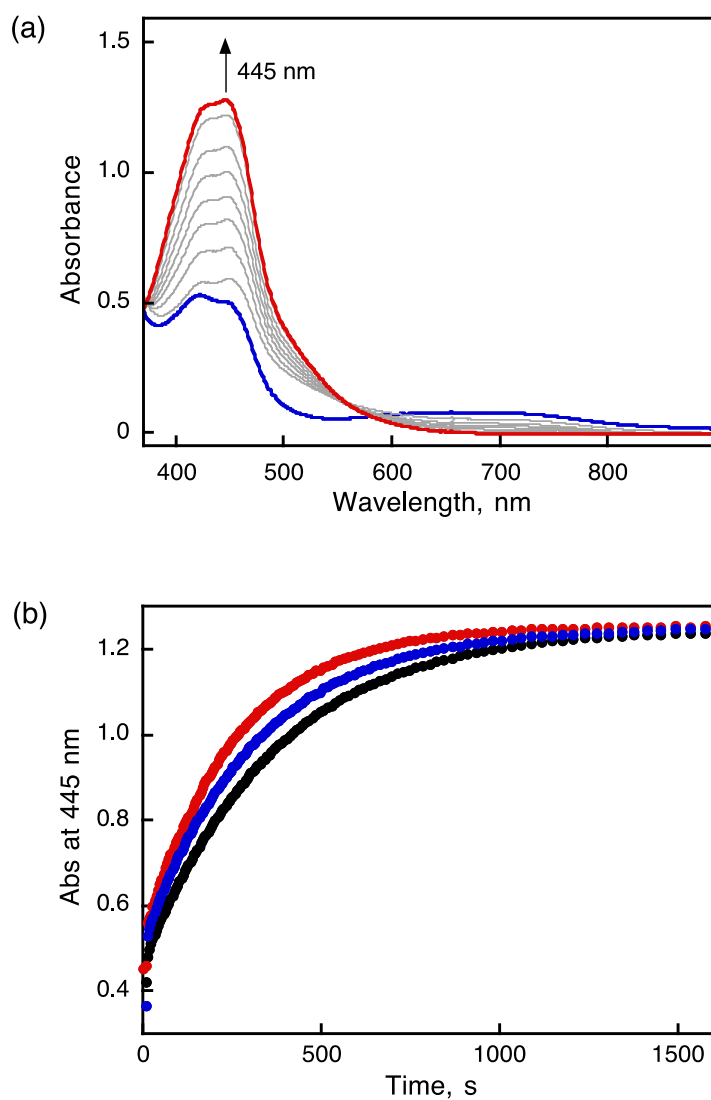

**Fig. S7** (a) Visible spectral change observed in the oxidation of H<sub>2</sub>O by [Ru<sup>III</sup>(Me<sub>2</sub>phen)<sub>3</sub>]<sup>3+</sup> (50 μM, blue line) with **1** (0.20 mM) in the presence of Sc(NO<sub>3</sub>)<sub>3</sub> (100 mM) in a solvent mixture of MeCN and H<sub>2</sub>O (*v/v* = 23:2) at 298 K. (b) Time courses monitored for the change of absorbance at 445 nm due to the formation of [Ru<sup>II</sup>(Me<sub>2</sub>phen)<sub>3</sub>]<sup>2+</sup> observed in the oxidation of H<sub>2</sub>O by [Ru<sup>III</sup>(Me<sub>2</sub>phen)<sub>3</sub>]<sup>3+</sup> (50 μM) with **1** [0.20 mM (black), 0.40 mM (blue), and 0.60 mM (red)] in the presence of Sc(NO<sub>3</sub>)<sub>3</sub> (100 mM) in a solvent mixture of MeCN and H<sub>2</sub>O (*v/v* = 23:2) at 298 K.

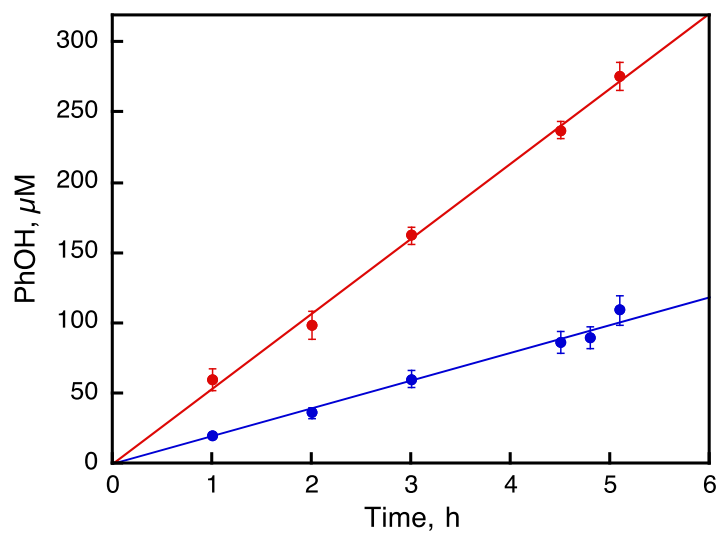

**Fig. S8** Time courses of concentration of PhOH produced in the hydroxylation of benzene (1.0 M) by H<sub>2</sub>O<sub>2</sub> [100 mM (blue) and 200 mM (red)] with a catalytic amount of **1** (1.0 μM) in an O<sub>2</sub>-saturated solvent mixture of MeCN and H<sub>2</sub>O (v/v = 23:2) at 298 K.
